# Supplementary figures and images for: Technological and Safety Characterization of Coagulase-Negative Staphylococci Isolated from Sardinian Fermented Sausage Made by Ovine Meat
Source: MDPI journal article supplement (doi:10.3390/foods13040633), 2024-02-19

## Supplementary Figure S1

Flow chart of the sheep sausages manufacturing process

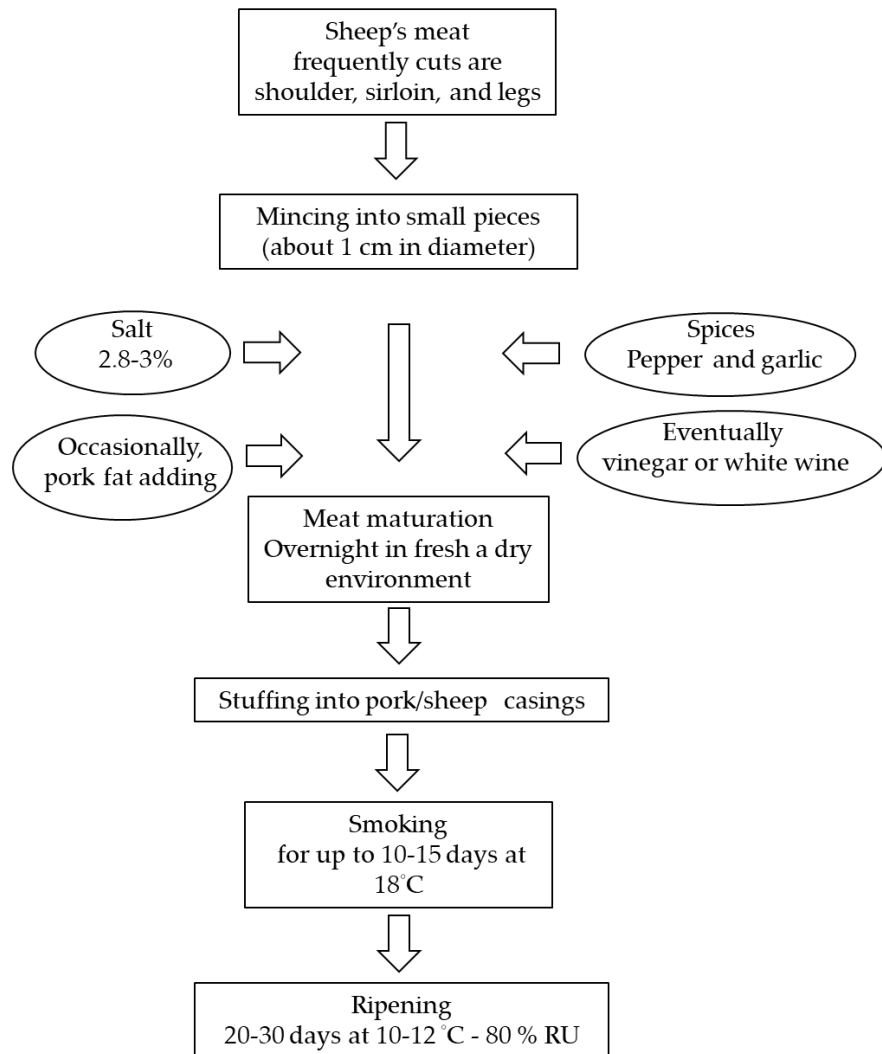

Supplement: s1 [file s1]
